# Supplementary material
Source: publisher figshare collection journal article supplement (https://aacr.figshare.com/articles/dataset/_/22429948)
Supplement: Supplementary file 1 [file 39876283]

**Fig S3.**

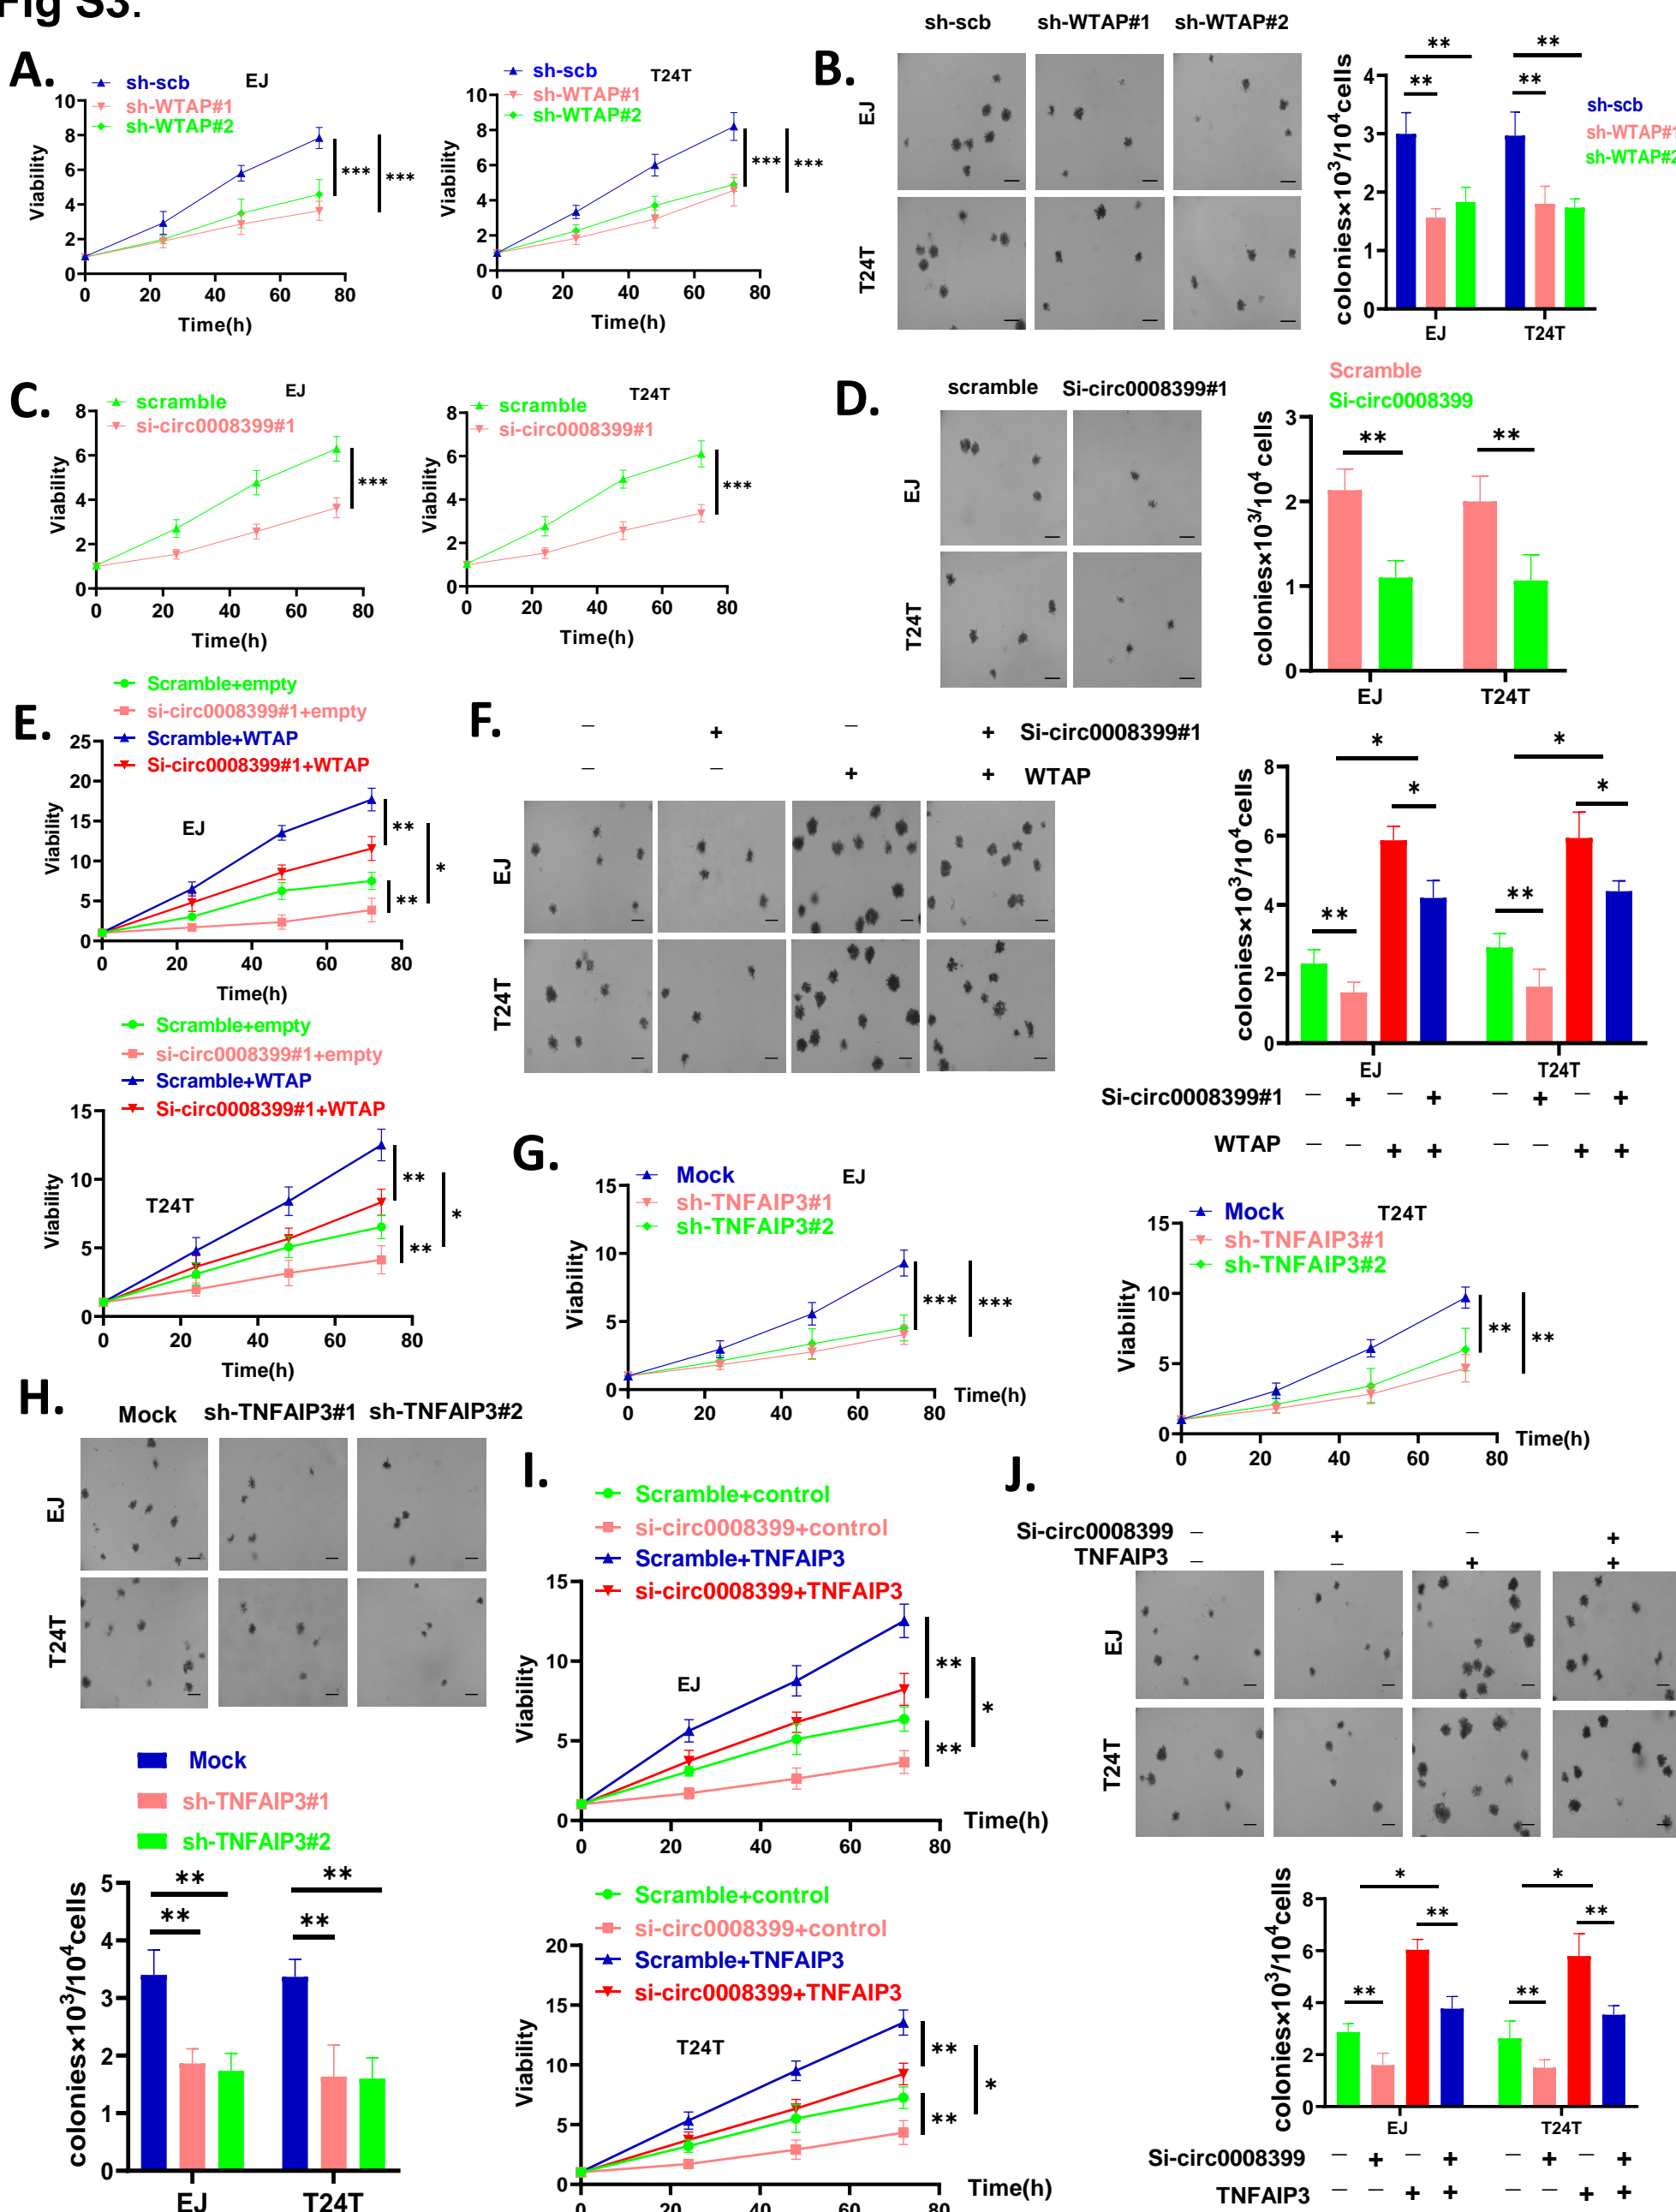

**Supplementary Fig.3 Knockdown of circ0008399/WTAP/TNFAIP3 pathway inhibits the viability and anchorage-independent growth of BC cells.**

(A) CCK-8 assay showed the viability of EJ and T24T cells stably transfected with sh-scb, sh-WTAP #1 or sh-WTAP #2.

(B) Anchorage-independent growth assay depicted the *in vitro* growth ability of EJ and T24T cells stably transfected with sh-scb, sh-WTAP #1 or sh-WTAP #2.

(C) CCK-8 assay showed the viability of EJ and T24T cells transfected with scramble or si-circ0008399#1.

(D) Anchorage-independent growth assay depicted the *in vitro* growth ability of EJ and T24T cells transfected with scramble or si-circ0008399#1.

(E) CCK-8 assay revealed the viability of EJ and T24T cells transfected with scramble or si-circ0008399#1, and those co-transfected with empty or WTAP.

(F) Anchorage-independent growth assay depicted the *in vitro* growth ability of EJ and T24T cells transfected with scramble or si-circ0008399#1, and those co-transfected with empty or WTAP.

(G-H) CCK-8 (G) and anchorage-independent growth assays (H) revealed the viability and *in vitro* growth ability of EJ and T24T cells stably transfected with mock, sh-TNFAIP3#1 or sh-TNFAIP3#2.

(I-J) CCK-8 (I) and anchorage-independent growth (J) assays showed the viability and *in vitro* growth ability of EJ and T24T cells transfected with scramble or si-circ0008399#1, and those co-transfected with control or TNFAIP3.

Data are presented as the means  $\pm$  SD from three independent experiments. \*P < 0.05; \*\*P < 0.01; \*\*\*P < 0.001 (Student's t test)
